## Research Article

# Associations of leptin and leptin receptor genetic variants with coronary artery disease: a meta-analysis

Peilin Xiao, Jianli Shi and  Xiaoli Liu

Department of Cardiology, The Second Affiliated Hospital of Chongqing Medical University, Chongqing 400010, China

**Correspondence:** Xiaoli Liu (xiaoliliu8836@126.com)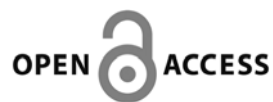

**Background:** Some pilot studies already tried to investigate potential associations of leptin (*LEP*) and *LEP* receptor (*LEPR*) variants with coronary artery disease (CAD). However, the results of these studies were not consistent. Thus, we performed the present meta-analysis to explore associations between *LEP/LEPR* variants and CAD in a larger pooled population.

**Methods:** Systematic literature research of PubMed, Web of Science, Embase and CNKI was performed to identify eligible case-control studies on associations between *LEP/LEPR* variants and CAD. The initial search was conducted in September 2018 and the latest update was performed in December 2018. Q test and  $I^2$  statistic were employed to assess between-study heterogeneities. If probability value (*P*-value) of Q test was less than 0.1 or  $I^2$  was greater than 50%, random-effect models (REMs) would be used to pool the data. Otherwise, fixed-effect models (FEMs) would be applied for synthetic analyses.

**Results:** A total of ten studies published between 2006 and 2018 were eligible for analyses (1989 cases and 2601 controls). Pooled analyses suggested that *LEP* rs7799039 variant was significantly associated with CAD under over-dominant model ( $P=0.0007$ , odds ratio (OR) = 1.36, 95% confidence interval (CI): 1.14–1.63,  $I^2 = 41\%$ , FEM) in overall population, and this significant finding was further confirmed in East Asians in subsequent subgroup analyses. However, no positive findings were observed for *LEPR* rs1137100 and rs1137101 variants in overall and subgroup analyses.

**Conclusions:** Our meta-analysis suggested that *LEP* rs7799039 variant might affect individual susceptibility to CAD.

## Introduction

Coronary artery disease (CAD) is the primary cause of mortality and morbidity worldwide [1,2]. However, despite its high prevalence, the exact pathogenesis of CAD is still not fully understood. Recently, growing evidence supports that genetic factors are crucial for its development. To begin with, family aggregation of CAD was extremely common, and past twin studies proved that hereditary factors accounted for approximately 50% of CAD occurrence [3,4]. Moreover, previous genetic association studies already identified numerous genetic variants that were associated with an increased susceptibility to CAD, and screening of common causal variants also proved to be a cost-efficient way to predict the individual risk of developing CAD [5,6]. In summary, these findings jointly supported that genetic predisposition factors played vital roles in the pathogenesis of CAD.

Leptin (*LEP*), a hormone that is primarily secreted by adipocytes, plays a pivotal role in regulating food intake, energy homeostasis and lipid metabolism by binding with *LEP* receptor (*LEPR*) [7,8]. Previous

Received: 23 February 2019  
Revised: 30 March 2019  
Accepted: 06 April 2019

Accepted Manuscript Online:  
21 May 2019  
Version of Record published:  
10 June 2019

**Table 1** The characteristics of included studies

| First author, year            | Country | Ethnicity   | Type of disease | Sample size | Genotype distribution |             | P-value for HWE | NOS score |
|-------------------------------|---------|-------------|-----------------|-------------|-----------------------|-------------|-----------------|-----------|
|                               |         |             |                 |             | Cases                 | Controls    |                 |           |
| <b>LEPR rs1137100</b>         |         |             |                 |             | AA/AG/GG              |             |                 |           |
| Aijälä, 2014 [16]             | Finland | Caucasian   | CAD             | 151/877     | 66/75/10              | 361/398/118 | 0.617           | 7         |
| An, 2016 [17]                 | China   | East Asian  | CAD             | 421/550     | 295/110/16            | 371/157/22  | 0.299           | 7         |
| Roszkowska-Gancarz, 2014 [20] | Russia  | Caucasian   | MI              | 226/414     | 118/86/22             | 218/171/25  | 0.259           | 7         |
| <b>LEPR rs1137101</b>         |         |             |                 |             | GG/GA/AA              |             |                 |           |
| Aijälä, 2014 [16]             | Finland | Caucasian   | CAD             | 152/882     | 48/80/24              | 312/427/143 | 0.878           | 7         |
| An, 2016 [17]                 | China   | East Asian  | CAD             | 421/550     | 306/103/12            | 362/162/26  | 0.158           | 7         |
| Khaki-Khatibi, 2018 [18]      | Iran    | South Asian | MI              | 80/80       | 18/37/25              | 30/36/14    | 0.576           | 8         |
| Nowzari, 2018 [19]            | Iran    | South Asian | CAD             | 156/130     | 70/61/25              | 63/34/33    | <0.001          | 7         |
| Roszkowska-Gancarz, 2014 [20] | Russia  | Caucasian   | MI              | 226/414     | 59/108/59             | 116/206/92  | 0.976           | 7         |
| Wu, 2013 [22]                 | China   | East Asian  | CAD             | 200/100     | 42/90/68              | 44/38/18    | 0.064           | 8         |
| <b>LEP rs7799039</b>          |         |             |                 |             | GG/GA/AA              |             |                 |           |
| Nowzari, 2018 [19]            | Iran    | South Asian | CAD             | 156/130     | 61/73/22              | 58/51/21    | 0.095           | 7         |
| Roszkowska-Gancarz, 2014 [20] | Russia  | Caucasian   | MI              | 226/414     | 67/120/39             | 139/203/72  | 0.885           | 7         |
| Wang, 2013 [21]               | China   | East Asian  | CAD             | 200/100     | 65/100/35             | 37/46/17    | 0.677           | 8         |
| Zhai, 2013 [23]               | China   | East Asian  | CAD             | 200/100     | 102/86/12             | 45/38/17    | 0.080           | 8         |
| Zhao, 2006 [24]               | China   | East Asian  | CAD             | 156/150     | 80/68/8               | 68/56/26    | 0.020           | 8         |
| Zheng, 2014 [25]              | China   | East Asian  | CAD             | 198/95      | 68/97/33              | 65/24/6     | 0.084           | 7         |

Abbreviation: MI, myocardial infarction.

studies showed that serum levels of LEP were significantly elevated in patients with obesity, diabetes, insulin resistance, hypertension and atherosclerosis, suggesting that LEP/LEPR might be involved in pathogenesis of above-mentioned diseases [9–11]. Considering the close relationship between these disorders and CAD, it is possible that functional LEP/LEPR variants, which may result in altered LEP levels, may also impact individual susceptibility to CAD.

Previous studies showed that functional LEP/LEPR variants were correlated with higher plasma levels of LEP [12,13]. As a result, some pilot studies tried to investigate potential associations between LEP/LEPR variants and CAD. But the results of these studies were not consistent. Thus, we performed the present meta-analysis to explore associations between LEP/LEPR variants and CAD in a larger pooled population.

## Materials and methods

### Literature search and inclusion criteria

In accordance with Reporting Items for Systematic Reviews and Meta-analyses (PRISMA) guideline, eligible studies were retrieved from PubMed, Web of Science, Embase and CNKI using the following searching strategy: (leptin receptor OR LEPR OR leptin OR LEP) AND (polymorphism OR variant OR variation OR mutation OR genotype OR allele) AND (coronary heart disease OR coronary artery disease OR angina pectoris OR acute coronary syndrome OR myocardial infarction) [14]. The initial search was conducted in September 2018 and the latest update was performed in December 2018. Moreover, we also checked the references of eligible articles to identify other potential relevant studies.

Included studies should meet all the following criteria: (i) case-control study about LEP/LEPR variants and CAD; (ii) provide genotypic frequency of investigated variants in cases and controls; (iii) full text in English or Chinese available. Studies were excluded if one of the following criteria was fulfilled: (i) not relevant to LEP/LEPR variants and CAD; (ii) *in vitro* studies or animal studies; (iii) case reports or case series; (iv) abstracts, reviews, comments, letters and conference presentations.

### Data extraction and quality assessment

We extracted following data from the included studies: (i) the name of the first author; (ii) publication time; (iii) country and ethnicity; (iv) sample size; and (v) genotypic distributions of LEP/LEPR variants in cases and controls. The probability value (*P*-value) of Hardy-Weinberg equilibrium (HWE) was also calculated. When necessary, we

wrote to the corresponding authors for extra information. We used the Newcastle–Ottawa scale (NOS) to assess the quality of eligible studies [15]. This scale has a score range of 0–9, and studies with a score of more than 7 were thought to be of high quality. Data extraction and quality assessment were performed by two independent reviewers (Peilin Xiao and Jianli Shi). Any disagreement between two reviewers was solved by discussion until a consensus was reached.

## Statistical analyses

We used Review Manager Version 5.3.3 (The Cochrane Collaboration, Software Update) to conduct statistical analyses. We calculated odds ratios (ORs) and 95% confidence intervals (CIs) to estimate strength of associations in all possible genetic models, and  $P$ -values  $\leq 0.05$  were considered to be statistically significant. All investigated *LEP/LEPR* variants contain a major allele (M) and a minor allele (m), the dominant comparison is defined as MM versus Mm + mm, recessive comparison is defined as mm vs. MM + Mm, over-dominant comparison is defined as Mm versus MM + mm, and the allele comparison is defined as M versus m. Q test and  $I^2$  statistic were employed to assess between-study heterogeneities. If  $P$ -value of Q test was less than 0.1 or  $I^2$  was greater than 50%, random-effect models (REMs) would be used to pool the data. Otherwise, fixed-effect models (FEMs) would be used to pool the data. Subgroup analyses by ethnicity of participants and type of disease were performed. Sensitivity analyses were performed to evaluate the statistical robustness of the findings, and publication biases were evaluated with funnel plots.

## Results

### Characteristics of included studies

We found 80 potential relevant articles. Among these articles, a total of ten studies published between 2006 and 2018 were eligible for pooled analyses [16–25] (see Figure 1). The NOS score of eligible articles ranged from 7 to 8, which indicated that all included studies were of high quality. Baseline characteristics of included studies were shown in Table 1.

### Overall and subgroup analyses

Three studies about *LEPR* rs1137100 A/G variant (798 cases and 1841 controls), six studies about *LEPR* rs1137101 G/A variant (1235 cases and 2156 controls) and six studies about *LEP* rs7799039 G/A variant (1136 cases and 989 controls) were eligible for synthetic analyses. Pooled analyses showed that *LEP* rs7799039 G/A variant was significantly associated with CAD under over-dominant model (GA vs. GG + AA,  $P=0.0007$ , OR = 1.36, 95%CI: 1.14–1.63,  $I^2 = 41\%$ , FEM) in overall population, and this significant finding was further confirmed in East Asians in subsequent subgroup analyses (GA vs. GG + AA,  $P=0.04$ , OR = 1.50, 95%CI: 1.02–2.20,  $I^2 = 59\%$ , REM). However, no any positive findings were observed for *LEPR* rs1137100 and rs1137101 variants in overall and subgroup analyses (see Table 2 and Supplementary Figures S1–S3).

### Sensitivity analyses

We performed sensitivity analyses to test stabilities of pooled results by excluding one study each time. No altered results were observed in overall and subgroup comparisons, which indicated that our findings were statistically stable.

### Publication biases

We used funnel plots to assess publication biases. We did not find obvious asymmetry of funnel plots in any comparisons, which suggested that our findings were unlikely to be impacted by severe publication biases (see Supplementary Figures S4–S6).

## Discussion

As far as we know, this is the first meta-analysis on associations of *LEP/LEPR* variants with CAD, and our pooled analyses suggested that *LEP* rs7799039 G/A variant might affect individual susceptibility to CAD. There are several notable points about this meta-analysis. First, there are two possible explanations for our positive findings regarding *LEP* rs7799039 G/A variant and CAD. First, this variant may lead to alteration in gene expression or change in *LEP* protein structure, which may subsequently affect biological functions of *LEP*, result in elevated level of *LEP* and ultimately impact individual susceptibility to CAD. Second, it is also possible that *LEP/LEPR* variants may be linked to each other or even linked to other unidentified genes, which could also impact individual susceptibility to CAD [26]. Second, it is worth noting that the functional significances of two investigated *LEPR* variants were also well

**Table 2 Results of overall and subgroup analyses**

| Polymorphisms         | Population  | Sample size<br>Cases/<br>Controls | Dominant comparison |                  |                | Recessive comparison |                  |                | Over-dominant comparison |                         |                | Allele comparison |                  |                |
|-----------------------|-------------|-----------------------------------|---------------------|------------------|----------------|----------------------|------------------|----------------|--------------------------|-------------------------|----------------|-------------------|------------------|----------------|
|                       |             |                                   | P value             | OR (95%CI)       | I <sup>2</sup> | P value              | OR (95%CI)       | I <sup>2</sup> | P value                  | OR (95%CI)              | I <sup>2</sup> | P value           | OR (95%CI)       | I <sup>2</sup> |
| <b>LEPR rs1137100</b> | Overall     | 798/1841                          | 0.80                | 0.91 (0.43–1.92) | 76%            | 0.42                 | 1.08 (0.90–1.29) | 0%             | 0.64                     | 0.96 (0.80–1.15)        | 4%             | 0.35              | 0.93 (0.81–1.08) | 31%            |
|                       | Caucasian   | 377/1291                          | 0.85                | 0.88 (0.24–3.20) | 88%            | 0.75                 | 1.04 (0.82–1.32) | 0%             | 0.93                     | 1.01 (0.80–1.28)        | 37%            | 0.74              | 0.95 (0.70–1.29) | 65%            |
| <b>LEPR rs1137101</b> | Overall     | 1235/2156                         | 0.17                | 0.76 (0.52–1.13) | 81%            | 0.62                 | 1.12 (0.72–1.72) | 73%            | 0.49                     | 1.09 (0.86–1.38)        | 53%            | 0.31              | 0.85 (0.63–1.16) | 85%            |
|                       | East Asian  | 621/650                           | 0.61                | 0.70 (0.18–2.76) | 95%            | 0.80                 | 1.19 (0.31–4.61) | 89%            | 0.94                     | 0.98 (0.58–1.66)        | 71%            | 0.67              | 0.79 (0.27–2.32) | 96%            |
|                       | South Asian | 236/210                           | 0.10                | 0.72 (0.49–1.06) | 46%            | 0.92                 | 1.07 (0.29–3.99) | 87%            | 0.06                     | 1.46 (0.99–2.16)        | 44%            | 0.62              | 0.83 (0.39–1.75) | 86%            |
|                       | Caucasian   | 378/1296                          | 0.31                | 0.87 (0.67–1.13) | 0%             | 0.44                 | 1.12 (0.84–1.50) | 0%             | 0.76                     | 1.04 (0.82–1.31)        | 5%             | 0.27              | 0.91 (0.77–1.08) | 0%             |
|                       | MI          | 306/494                           | 0.27                | 0.71 (0.39–1.30) | 60%            | 0.05                 | 1.39 (0.99–1.94) | 40%            | 0.73                     | 0.95 (0.71–1.27)        | 0%             | 0.18              | 0.73 (0.47–1.15) | 70%            |
| <b>LEP rs7799039</b>  | Overall     | 1136/989                          | 0.27                | 0.78 (0.50–1.21) | 82%            | 0.38                 | 0.77 (0.43–1.38) | 78%            | <b>0.0007</b>            | <b>1.36 (1.14–1.63)</b> | 41%            | 0.67              | 0.92 (0.64–1.34) | 87%            |
|                       | East Asian  | 754/445                           | 0.46                | 0.76 (0.36–1.59) | 89%            | 0.50                 | 0.70 (0.25–1.96) | 86%            | <b>0.04</b>              | <b>1.50 (1.02–2.20)</b> | 59%            | 0.79              | 0.92 (0.48–1.75) | 92%            |

The values in bold represent statistically significant differences between cases and controls. Abbreviation: MI, myocardial infarction.

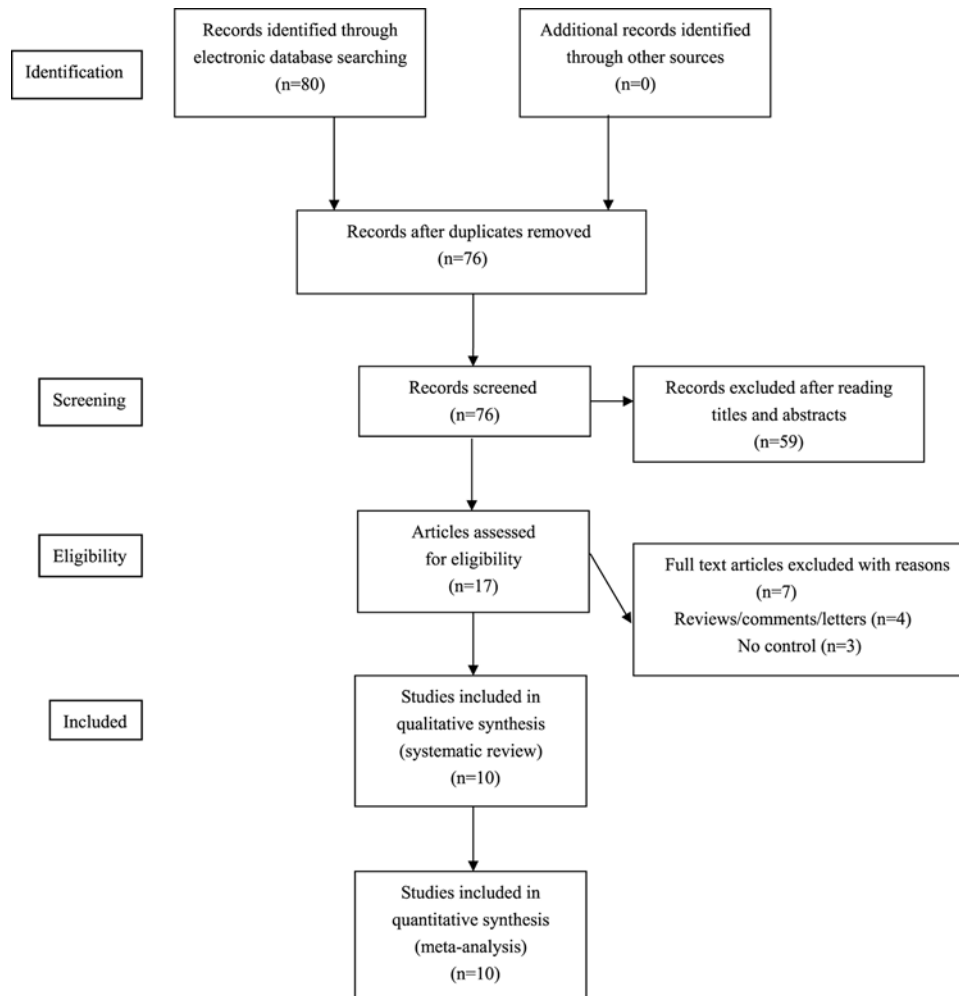

**Figure 1.** Flow chart of study selection for the present study

established [27,28], yet no significant associations were observed for these two variants. Since the sample sizes of pooled analyses in the current meta-analysis were still relatively small, it is possible that our study was still not statistically adequate to detect the actual associations between *LEP/LEPR* variants and CAD in every genetic comparison. Therefore, further studies with larger sample sizes still need to test the associations between *LEPR* variants and CAD. Third, the pathogenesis of CAD is extremely complex, and therefore the probability that a specific genetic variant could significantly contribute to its development is low, and we strongly recommend further studies to perform haplotype analyses and explore potential gene–gene interactions. Fourth, to more precisely measure the effects of certain endogenous/exogenous factors on disease occurrence and development, molecular pathologic epidemiology (MPE) analyses should be adopted. However, since included studies only focused on the effects of *LEP/LEPR* variants on individual susceptibility to CAD, such analyses were infeasible in the current meta-analysis. But to better elucidate the underlying pathogenesis mechanisms of CAD, future studies should try to investigate the interaction of *LEP/LEPR* variants (as endogenous factors) with potential pathogenic environmental factors (as exogenous factors) as an MPE approach [29]. Fifth, between-study heterogeneities remained significant in several subgroup comparisons, which indicated that differences in genotypic distributions of investigated variants among eligible studies could not be fully explained by differences in type of disease or ethnicity of study subjects, and other baseline characteristics of participants may also contribute to heterogeneities between studies. Sixth, the present meta-analysis aimed to investigate associations between all *LEP/LEPR* variants and CAD. Nevertheless, only three variants were analyzed because no other variants were studied by at least two eligible studies.

Like all meta-analysis, the present study certainly has some limitations. First, due to lack of raw data, adjusted analyses were inapplicable, and we have to admit that failure to perform further adjusted analyses for potential confounding

factors might impact the reliability of our findings [30]. Second, associations between *LEP/LEPR* variants and CAD might also be modified by gene–environmental interactions. However, we could not perform relevant analyses accordingly since most of studies did not investigate these associations [31,32]. Considering that certain environmental factors like smoking, air pollution, lack of physical exercise and high caloric diets were already verified to be potential risk factors of CAD, potential gene–environmental interactions should also be analyzed by future genetic association studies [33]. Third, gray literatures like abstracts and other research materials that were not formally published in academic journals were not considered to be eligible for analyses in this meta-analysis since it was hard to determine their quality. However, since gray literatures were not analyzed, although funnel plots suggested that severe publication biases were unlikely, it is still possible that our findings may be impacted by potential publication biases [34]. On account of above-mentioned limitations, our findings should be cautiously interpreted.

In conclusion, our meta-analysis suggested that *LEP* rs7799039 variant might affect individual susceptibility to CAD. However, further well-designed studies with larger sample sizes still need to confirm our findings. Moreover, future investigations are also warranted to explore potential roles of other *LEP/LEPR* variants in the development of CAD.

### Author Contribution

Xiaoli Liu conceived of the study, participated in its design. Xiaoli Liu and Peilin Xiao conducted the systematic literature review. Peilin Xiao and Jianli Shi performed data analyses and drafted the manuscript. All gave final approval and agree to be accountable for all aspects of work ensuring integrity and accuracy.

### Funding

The authors declare that there are no sources of funding to be acknowledged.

### Competing Interests

The authors declare that there are no competing interests associated with the manuscript.

### Abbreviations

CAD, coronary artery disease; CI, confidence interval; FEM, fixed-effect model; *LEP*, leptin; *LEPR*, *LEP* receptor; MPE, molecular pathologic epidemiology; NOS, Newcastle–Ottawa scale; OR, odds ratio; *P*-value, probability value; REM, random-effect model.

### References

- Moran, A.E., Forouzanfar, M.H., Roth, G., Mensah, G.A., Ezzati, M., Flaxman, A. et al. (2014) The Global Burden of Ischemic Heart Disease in 1990 and 2010: The Global Burden of Disease 2010 Study. *Circulation* **129**, 1493–1501, <https://doi.org/10.1161/CIRCULATIONAHA.113.004046>
- Global Burden of Disease Study 2013 Collaborators (2015) Global, regional, and national incidence, prevalence, and years lived with disability for 301 acute and chronic diseases and injuries in 188 countries, 1990–2013: a systematic analysis for the Global Burden of Disease Study 2013. *Lancet* **386**, 743–800, [https://doi.org/10.1016/S0140-6736\(15\)60692-4](https://doi.org/10.1016/S0140-6736(15)60692-4)
- Mayer, B., Erdmann, J. and Schunkert, H. (2007) Genetics and heritability of coronary artery disease and myocardial infarction. *Clin. Res. Cardiol.* **96**, 1–7, <https://doi.org/10.1007/s00392-006-0447-y>
- Evans, A., Van Baal, G.C., McCarron, P., DeLange, M., Soerensen, T.I., De Geus, E.J. et al. (2003) The genetics of coronary heart disease: the contribution of twin studies. *Twin Res.* **6**, 432–441, <https://doi.org/10.1375/136905203770326439>
- Sayols-Baixeras, S., Lluís-Ganella, C., Lucas, G. and Elosua, R. (2014) Pathogenesis of coronary artery disease: focus on genetic risk factors and identification of genetic variants. *Appl. Clin. Genet.* **7**, 15–32
- Dai, X., Wiernek, S., Evans, J.P. and Runge, M.S. (2016) Genetics of coronary artery disease and myocardial infarction. *World J. Cardiol.* **8**, 1–23, <https://doi.org/10.4330/wjc.v8.i1.1>
- Münzberg, H. and Morrison, C.D. (2015) Structure, production and signaling of leptin. *Metabolism* **64**, 13–23, <https://doi.org/10.1016/j.metabol.2014.09.010>
- Zhang, F., Chen, Y., Heiman, M. and Dimarchi, R. (2005) Leptin: structure, function and biology. *Vitam. Horm.* **71**, 345–372, [https://doi.org/10.1016/S0083-6729\(05\)71012-8](https://doi.org/10.1016/S0083-6729(05)71012-8)
- Maghbooli, Z., Hossein-Nezhad, A., Rahmani, M., Shafaei, A.R. and Larijani, B. (2007) Relationship between leptin concentration and insulin resistance. *Horm. Metab. Res.* **39**, 903–907, <https://doi.org/10.1055/s-2007-992812>
- Olczyk, P., Koprowski, R., Komosinska-Vassev, K., Jura-Póltorak, A., Winsz-Szczotka, K., Kuźnik-Trocha, K. et al. (2017) Adiponectin, leptin, and leptin receptor in obese patients with type 2 diabetes treated with insulin detemir. *Molecules* **22**, E1274, <https://doi.org/10.3390/molecules22081274>
- Dubern, B. and Clement, K. (2012) Leptin and leptin receptor-related monogenic obesity. *Biochimie* **94**, 2111–2115, <https://doi.org/10.1016/j.biochi.2012.05.010>
- Afroze, D., Yousuf, A., Ali, R., Kawoosa, F., Akhtar, T., Reshi, S. et al. (2015) Serum leptin levels, leptin receptor gene (*LEPR*) polymorphism, and the risk of systemic lupus erythematosus in Kashmiri population. *Immunol. Invest.* **44**, 113–125, <https://doi.org/10.3109/08820139.2014.909457>

- 13 Dasgupta, S., Salman, M., Siddalingaiah, L.B., Lakshmi, G.L., Xaviour, D. and Sreenath, J. (2014) Genetic variants in leptin: determinants of obesity and leptin levels in South Indian population. *Adipocyte* **4**, 135–140, <https://doi.org/10.4161/21623945.2014.975538>
- 14 Moher, D., Liberati, A., Tetzlaff, J., Altman, D.G. and PRISMA group (2009) Preferred reporting items for systematic reviews and meta-analyses: the PRISMA statement. *Ann. Intern. Med.* **151**, 264–269, <https://doi.org/10.7326/0003-4819-151-4-200908180-00135>
- 15 Stang, A. (2010) Critical evaluation of the Newcastle-Ottawa scale for the assessment of the quality of nonrandomized studies in meta-analyses. *Eur. J. Epidemiol.* **25**, 603–605, <https://doi.org/10.1007/s10654-010-9491-z>
- 16 Aijälä, M., Santaniemi, M., Bloigu, R., Kesäniemi, Y.A. and Ukkola, O. (2014) Leptin receptor Arg109 homozygotes display decreased total mortality as well as lower incidence of cardiovascular disease and related death. *Gene* **534**, 88–92, <https://doi.org/10.1016/j.gene.2013.10.003>
- 17 An, B.Q., Lu, L.L., Yuan, C., Xin, Y.N. and Xuan, S.Y. (2016) Leptin receptor gene polymorphisms and the risk of non-alcoholic fatty liver disease and coronary atherosclerosis in the chinese han population. *Hepat. Mon.* **16**, e35055, <https://doi.org/10.5812/hepatmon.35055>
- 18 Khaki-Khatibi, F., Mansouri, F., Hajahmadipoorrafsanjani, M., Ghojzadeh, M. and Gholikhani-Darbroud, R. (2018) Study of rs1137101 polymorphism of leptin receptor gene with serum levels of selenium and copper in the patients of non-ST-segment elevation myocardial infarction (NSTEMI) in an Iranian population. *Clin. Biochem.* **60**, 64–70, <https://doi.org/10.1016/j.clinbiochem.2018.06.016>
- 19 Nowzari, Z., Masoumi, M., Nazari-Robati, M., Akbari, H., Shahrokhi, N. and Asadikaram, G. (2018) Association of polymorphisms of leptin, leptin receptor and apelin receptor genes with susceptibility to coronary artery disease and hypertension. *Life Sci.* **207**, 166–171, <https://doi.org/10.1016/j.lfs.2018.06.007>
- 20 Roszkowska-Gancarz, M., Kurylowicz, A., Polosak, J., Mossakowska, M., Franek, E. and Puzianowska-Kuźnicka, M. (2014) Functional polymorphisms of the leptin and leptin receptor genes are associated with longevity and with the risk of myocardial infarction and of type 2 diabetes mellitus. *Endokrynol. Pol.* **65**, 11–16, <https://doi.org/10.5603/EP.2014.0002>
- 21 Wang, F. (2013) *The Correlation Between Leptin Gene Promoter Polymorphism and Early Onset Coronary Heart Disease*, Dissertation, Tianjin Medical University
- 22 Wu, X. (2013) *The Correlation Between Leptin Receptor Gene Polymorphism and Coronary Heart Disease*, Dissertation, Tianjin Medical University
- 23 Zhai, S. (2013) *The Study of Leptin Gene Polymorphism -2548G/A in Patients with Premature Coronary Heart Disease*, Dissertation, Tianjin Medical University
- 24 Zhao, Y., Wang, H. and Zeng, H. (2006) The study of leptin gene polymorphism G-2548A in patients with coronary heart disease. *J. Clin. Intern. Med.* **23**, 489–491
- 25 Zheng, X., Liu, X., Ni, Z., Zhang, W. and Bai, J. (2014) The study of leptin gene promoter polymorphism in patients with premature coronary heart disease. *J. Pract. Med.* **30**, 2789–2791
- 26 Ben Ali, S., Kallel, A., Ftouhi, B., Sediri, Y., Feki, M., Slimane, H. et al. (2009) Association of G-2548A LEP polymorphism with plasma leptin levels in Tunisian obese patients. *Clin. Biochem.* **42**, 584–588, <https://doi.org/10.1016/j.clinbiochem.2008.11.001>
- 27 Nesrine, Z., Haitthem, H., Imen, B., Fadoua, N., Asma, O., Fadhel, N.M. et al. (2018) Leptin and Leptin receptor polymorphisms, plasma Leptin levels and obesity in Tunisian volunteers. *Int. J. Exp. Pathol.* **99**, 121–130, <https://doi.org/10.1111/iep.12271>
- 28 Fan, S.H. and Say, YH. (2014) Leptin and leptin receptor gene polymorphisms and their association with plasma leptin levels and obesity in a multi-ethnic Malaysian suburban population. *J. Physiol. Anthropol.* **33**, 15, <https://doi.org/10.1186/1880-6805-33-15>
- 29 Nishi, A., Milner, Jr, D.A., Giovannucci, E.L., Nishihara, R., Tan, A.S., Kawachi, I. et al. (2016) Integration of molecular pathology, epidemiology and social science for global precision medicine. *Expert Rev. Mol. Diagn.* **16**, 11–23, <https://doi.org/10.1586/14737159.2016.1115346>
- 30 Xie, X., Shi, X. and Liu, M. (2017) The roles of TLR gene variants in atherosclerosis: a systematic review and meta-analysis of 35,317 subjects. *Scand. J. Immunol.* **86**, 50–58, <https://doi.org/10.1111/sji.12560>
- 31 Shi, X., Xie, X., Jia, Y. and Li, S. (2016) Associations of insulin receptor and insulin receptor substrates genetic variants with polycystic ovary syndrome: a systematic review and meta-analysis. *J. Obstet. Gynaecol. Res.* **42**, 844–854, <https://doi.org/10.1111/jog.13002>
- 32 Zhu, Y., Zheng, G. and Hu, Z. (2018) Association between SERT insertion/deletion polymorphism and the susceptibility of irritable bowel syndrome: a meta-analysis based on 7039 subjects. *Gene* **679**, 133–137, <https://doi.org/10.1016/j.gene.2018.08.059>
- 33 Liu, Z., Wang, Z., Hao, C., Tian, Y. and Fu, J. (2018) Effects of ADIPOQ polymorphisms on PCOS risk: a meta-analysis. *Reprod. Biol. Endocrinol.* **16**, 120, <https://doi.org/10.1186/s12958-018-0439-6>
- 34 Sun, H., Li, Q., Jin, Y. and Qiao, H. (2018) Associations of tumor necrosis factor- $\alpha$  variants with the susceptibility of asthma: a meta-analysis. *Exp. Mol. Pathol.* **105**, 411–416, <https://doi.org/10.1016/j.yexmp.2018.08.012>
